# Supplementary material
Source: publisher figshare collection journal article supplement (https://tandf.figshare.com/ndownloader/files/22782743)
Supplement: Supplementary file 1 [file 22782743]

**Supplementary material: Transcription conventions**

The transcription conventions used in the present study are outlined below. Hepburn and Bolden [37] provide a comprehensive survey of conversation-analytic transcription conventions.

| *Standard conventions* | |
| --- | --- |
| [okay] | Square brackets mark overlap; left where it begins, right where it ends. |
| = | Talk linked by equal signs carries on continuously. Within the same speaker’s turn, this indicates talk that carries over non-contiguous transcript lines, or words that are “rushed-through”. Between different speakers, it indicates latching. |
| (0.5) | Silences in tenths of seconds. Parentheses enclosing a single period are less than two tenths of a second. |
| ? ¿ , | Strongly rising terminal intonation, less strongly rising, and slightly rising respectively. |
| _ ; . | Level terminal intonation, slightly falling, and strongly falling respectively. |
|  |  |
| ↑ ↓ | Up and down arrows mark sharp shifts in pitch. |
| l:ong | Colons mark lengthening of the preceding sound. |
| bu- | Hyphens mark an abrupt cut-off. |
| stress | Underlining marks emphasis. |
| LOUD | Capitals mark talk that is substantially louder than surrounding talk. |
| ºquietº | Degrees symbols mark talk that is quieter than surrounding talk. |
| >fast< | Inward less than/greater than symbols mark talk that is faster than surrounding talk. |
| <slow> | Outward less than/greater than symbols mark talk that is slower than surrounding talk. |
| .hh hh (h) | In-breaths, out-breaths, and aspiration with a word respectively. |
| .mtk .tk | Lip smacks and alveolar clicks |
| (unsure) | Text in parentheses are a transcriptionist’s “best guess”. |
| ((activity)) | Text in double parentheses are a transcriptionist’s description of events. |
|  |  |
| *Additional conventions* | |
| **A1**  **A2**  **Ø** | Bolded “A1” and “A2” indicate the lines on which the target response mobilising actions begin. The corresponding lines of transcript are also presented in bold. “Ø” indicates an absent response. |
| (-----) | An alternative system for transcribing silence involves enclosing hyphens between parentheses. Each hyphen represents one tenth of a second, with every number indicating a corresponding second of silence. This notation is used when it is necessary to iconically depict the duration of silence. |
| *#here*  *#1.1* | Hash marks in italics signify the precise timing of screenshots presented in figures. The hash mark on the transcript line indicates the moment of the screenshot relative to talk or silence. The corresponding screenshot is depicted with a hash mark and a number immediately below. The number indicates the data extract, and order of the screenshot (e.g., the third screenshot for extract 5 would be labelled “*#5.3*”). |
|  |  |
